# Supplementary material
Source: Frontiers journal article supplement (https://www.frontiersin.org/articles/1604486)
Supplement: Data_Sheet_1.pdf [file Data_Sheet_1.pdf]

## In-person consultation

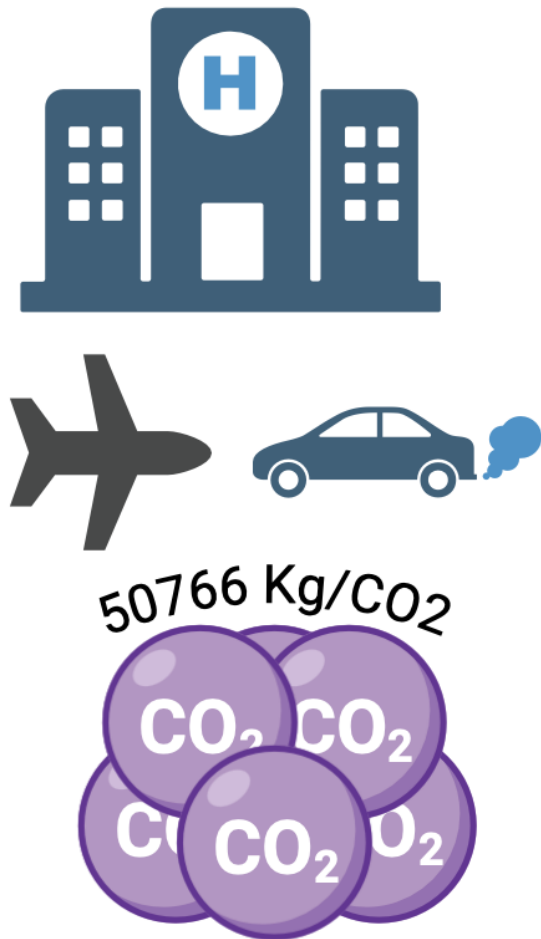

## Video consultation

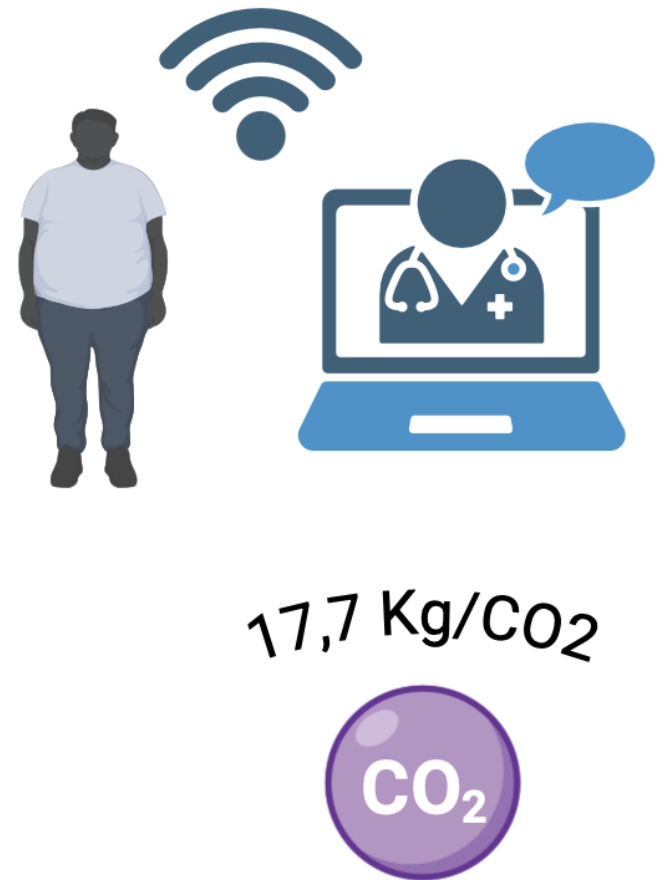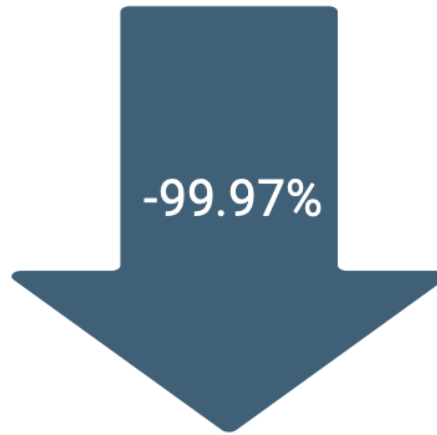

Remote consultations **reduced CO<sub>2</sub> emissions by 99.97%**  
with no impact on patients' clinical outcomes or surgical decisions
